# Supplementary material for: Connecdenn 3/DENND1C binds actin linking Rab35 activation to the actin cytoskeleton
Source: PubMed Central journal article supplement — Mol Biol Cell. 2012 Jan 1;23(1):163–75. doi: 10.1091/mbc.E11-05-0474 (PMC3248895; doi:10.1091/mbc.e11-05-0474), 2012-01-01
Supplement: supp_E11-05-0474_CombinedSupMats.pdf [file supp_E11-05-0474_CombinedSupMats.pdf]

**SUPPLEMENTAL MATERIAL**

**Connecdenn 3/DENND1C binds actin linking Rab35 activation  
to the actin cytoskeleton**

Andrea L. Marat, Maria S. Ioannou and Peter S. McPherson

Department of Neurology and Neurosurgery, Montreal Neurological Institute, McGill University,  
Montreal, Quebec H3A 2B4, Canada

Running Head: Connecdenn 3 binds actin

\*address correspondence to:

Dr. Peter S. McPherson  
Department of Neurology and Neurosurgery  
Montreal Neurological Institute  
McGill University  
3801 University Street  
Montreal, QC H3A 2B4  
Canada  
phone: (514) 398-7355  
fax: (514) 398-8106  
Email: [peter.mcpherson@mcgill.ca](mailto:peter.mcpherson@mcgill.ca)

### Supplemental Table 1: Oligoneucleotides used to generate constructs for this study

| Oligonucleotide name       | Sequence                                          |
|----------------------------|---------------------------------------------------|
| Rab1A aa1 S-BamHI          | GCGGGATCCATGTCCAGCATGAATCCCGAATATG                |
| Rab1A aa205 AS-XhoI        | GCGCTCGAGTTAGCAGCAACCTCCACCTGACTGC                |
| Rab13 aa1 S-BamHI          | GCGGGATCCATGGCCAAAGCCTACGACCAC                    |
| Rab13 aa203 AS-EcoRI       | GCGGAATTCTCAGCCCAGGGAGCACTTGTTGG                  |
| CD3 aa2 S-BglII            | GCGAGATCTGAATCCAGAGCTGAAGGGG                      |
| CD3 aa425 S-BamHI          | GCGGGATCCTGGGCCGACAATCTAAAGAAAG                   |
| CD3 aa785 AS-XhoI          | GCGCTCGAGTCACTGGGACTTTTGACAGTTGC                  |
| CD3 aa801 AS-XhoI          | GCGCTCGAGTCAACCCTCAAAGCACTTCTTAAG                 |
| CD3 aa789-801 WT S         | GATCCCCGCGCGTGGCGGATCTGAAAAAATGCTTTGAA<br>GGCTAAC |
| CD3 aa789-801 WT AS        | TCGAGTTAGCCTTCAAAGCATTTCAGATCCGCCACG<br>CGCGGG    |
| CD3 aa789-801 DL-794-AA S  | GATCCCCGCGCGTGGCGGCGGCGAAAAAATGCTTTGAA<br>GGCTAAC |
| CD3 aa789-801 DL-794-AA AS | TCGAGTTAGCCTTCAAAGCATTTCAGATCCGCCACG<br>CGCGGG    |
| CD3 aa789-801 KK-796-AA S  | GATCCCCGCGCGTGGCGGATCTGGCGGCGTGCTTTGAA<br>GGCTAAC |
| CD3 aa789-801 KK-796-AA AS | TCGAGTTAGCCTTCAAAGCACGCCGAGATCCGCCAC<br>GCGCGGG   |
| CD3 aa789-801 FE-799-AA S  | GATCCCCGCGCGTGGCGGATCTGAAAAAATGCGCGGCG<br>GGCTAAC |
| CD3 aa789-801 FE-799-AA A  | TCGAGTTAGCCCGCCGCGCATTTCAGATCCGCCACG<br>CGCGGG    |

## SUPPLEMENTAL FIGURE LEGENDS

**SUPPLEMENTAL FIGURE 1:** (A) Cos-7 and (B) NIH 3T3 cells were transfected with Flag-tagged connecdenn 3 and processed for immunofluorescence with a monoclonal antibody against the Flag tag (*red*). Actin was visualized by co-staining with FITC-labeled phalloidin (*green*). Z-stack were taken every 0.36  $\mu\text{m}$  from ventral side (1) to dorsal side (8). Scale bars: 10  $\mu\text{m}$ .

**SUPPLEMENTAL FIGURE 2:** The DENN domain from connecdenn 3 does not co-localize with actin. HeLa cells were transfected with Flag-tagged connecdenn 3 (CD3) DENN domain and processed for immunofluorescence with a monoclonal antibody against the Flag tag (*red*). Actin was visualized by co-staining with FITC labeled phalloidin (*green*). Scale bar: 10  $\mu\text{m}$ .

**SUPPLEMENTAL FIGURE 3:** The C-terminal region of connecdenn 3 maintains co-localization with actin. HeLa cells were transfected with Flag-tagged connecdenn 3 lacking the first 424 residues (CD3  $\Delta$ 1-424) and processed for immunofluorescence with a monoclonal antibody against the Flag tag (*red*). Actin was visualized by co-staining with Alexa Fluor 647 labeled phalloidin (*blue*). The inset shows the region indicated by the box. Scale bars: lower magnification, 10  $\mu\text{m}$ ; higher magnification, 5  $\mu\text{m}$ .

**SUPPLEMENTAL FIGURE 4:** The DENN domain is required for morphological changes seen upon connecdenn 3/Rab35 co-expression. HeLa cells were co-transfected with Flag-tagged connecdenn 3 lacking the first 424 residues (CD3  $\Delta$ 1-424) and Myc-tagged wild-type Rab35 and processed for immunofluorescence with a monoclonal antibody against the Flag tag (*red*) and a polyclonal antibody against the Myc tag (*green*). Actin was visualized by co-staining with FITC labeled phalloidin (*green*). The inset shows the region indicated by the box. Scale bars: lower magnification, 10  $\mu\text{m}$ ; higher magnification, 5  $\mu\text{m}$ .

COS-7

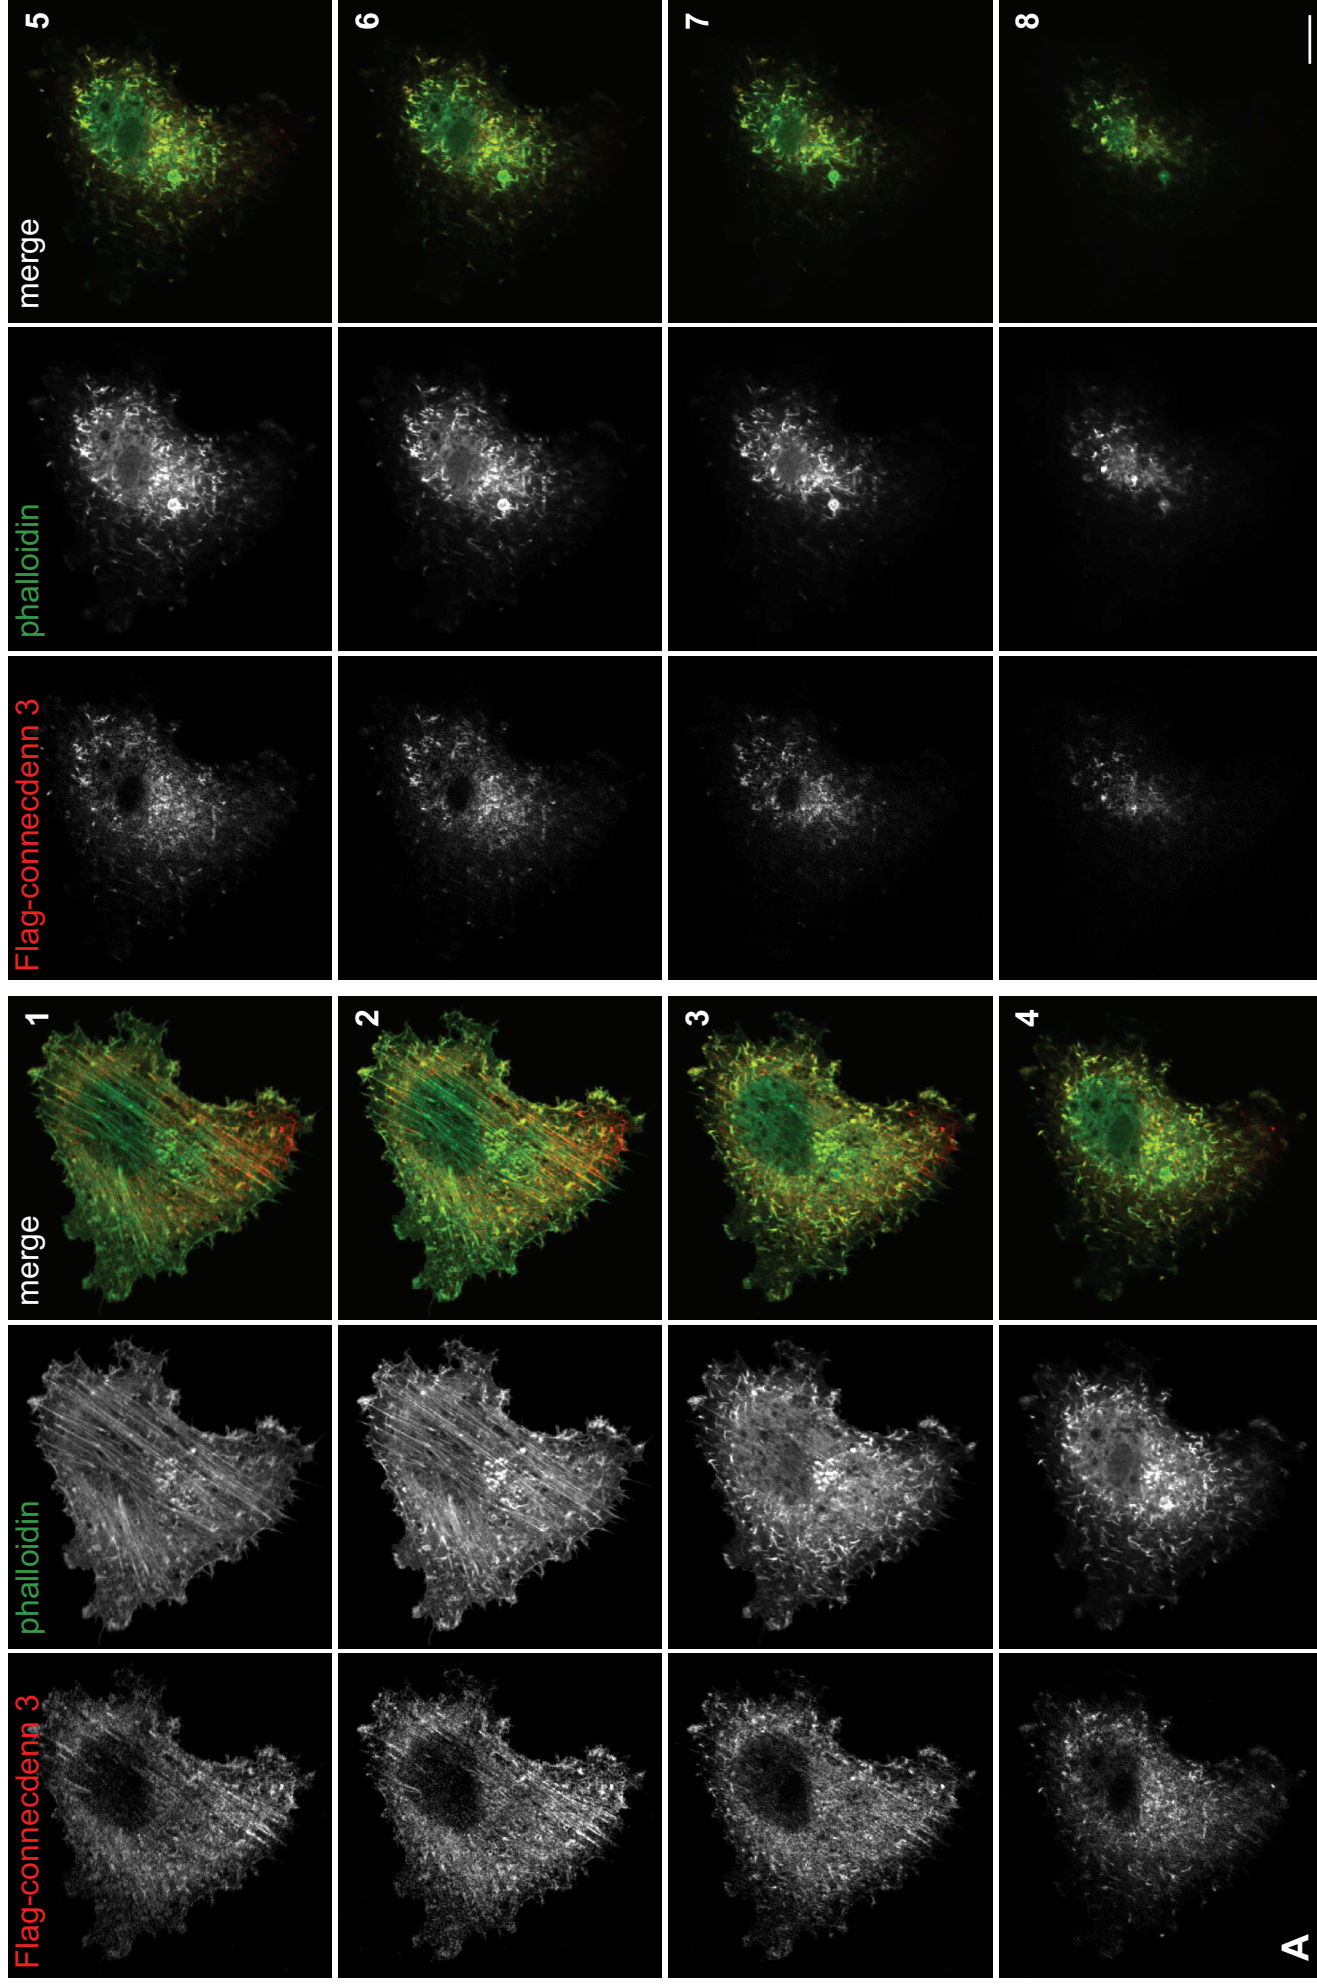

Marat et al., Supplemental Figure 1

NIH 3T3

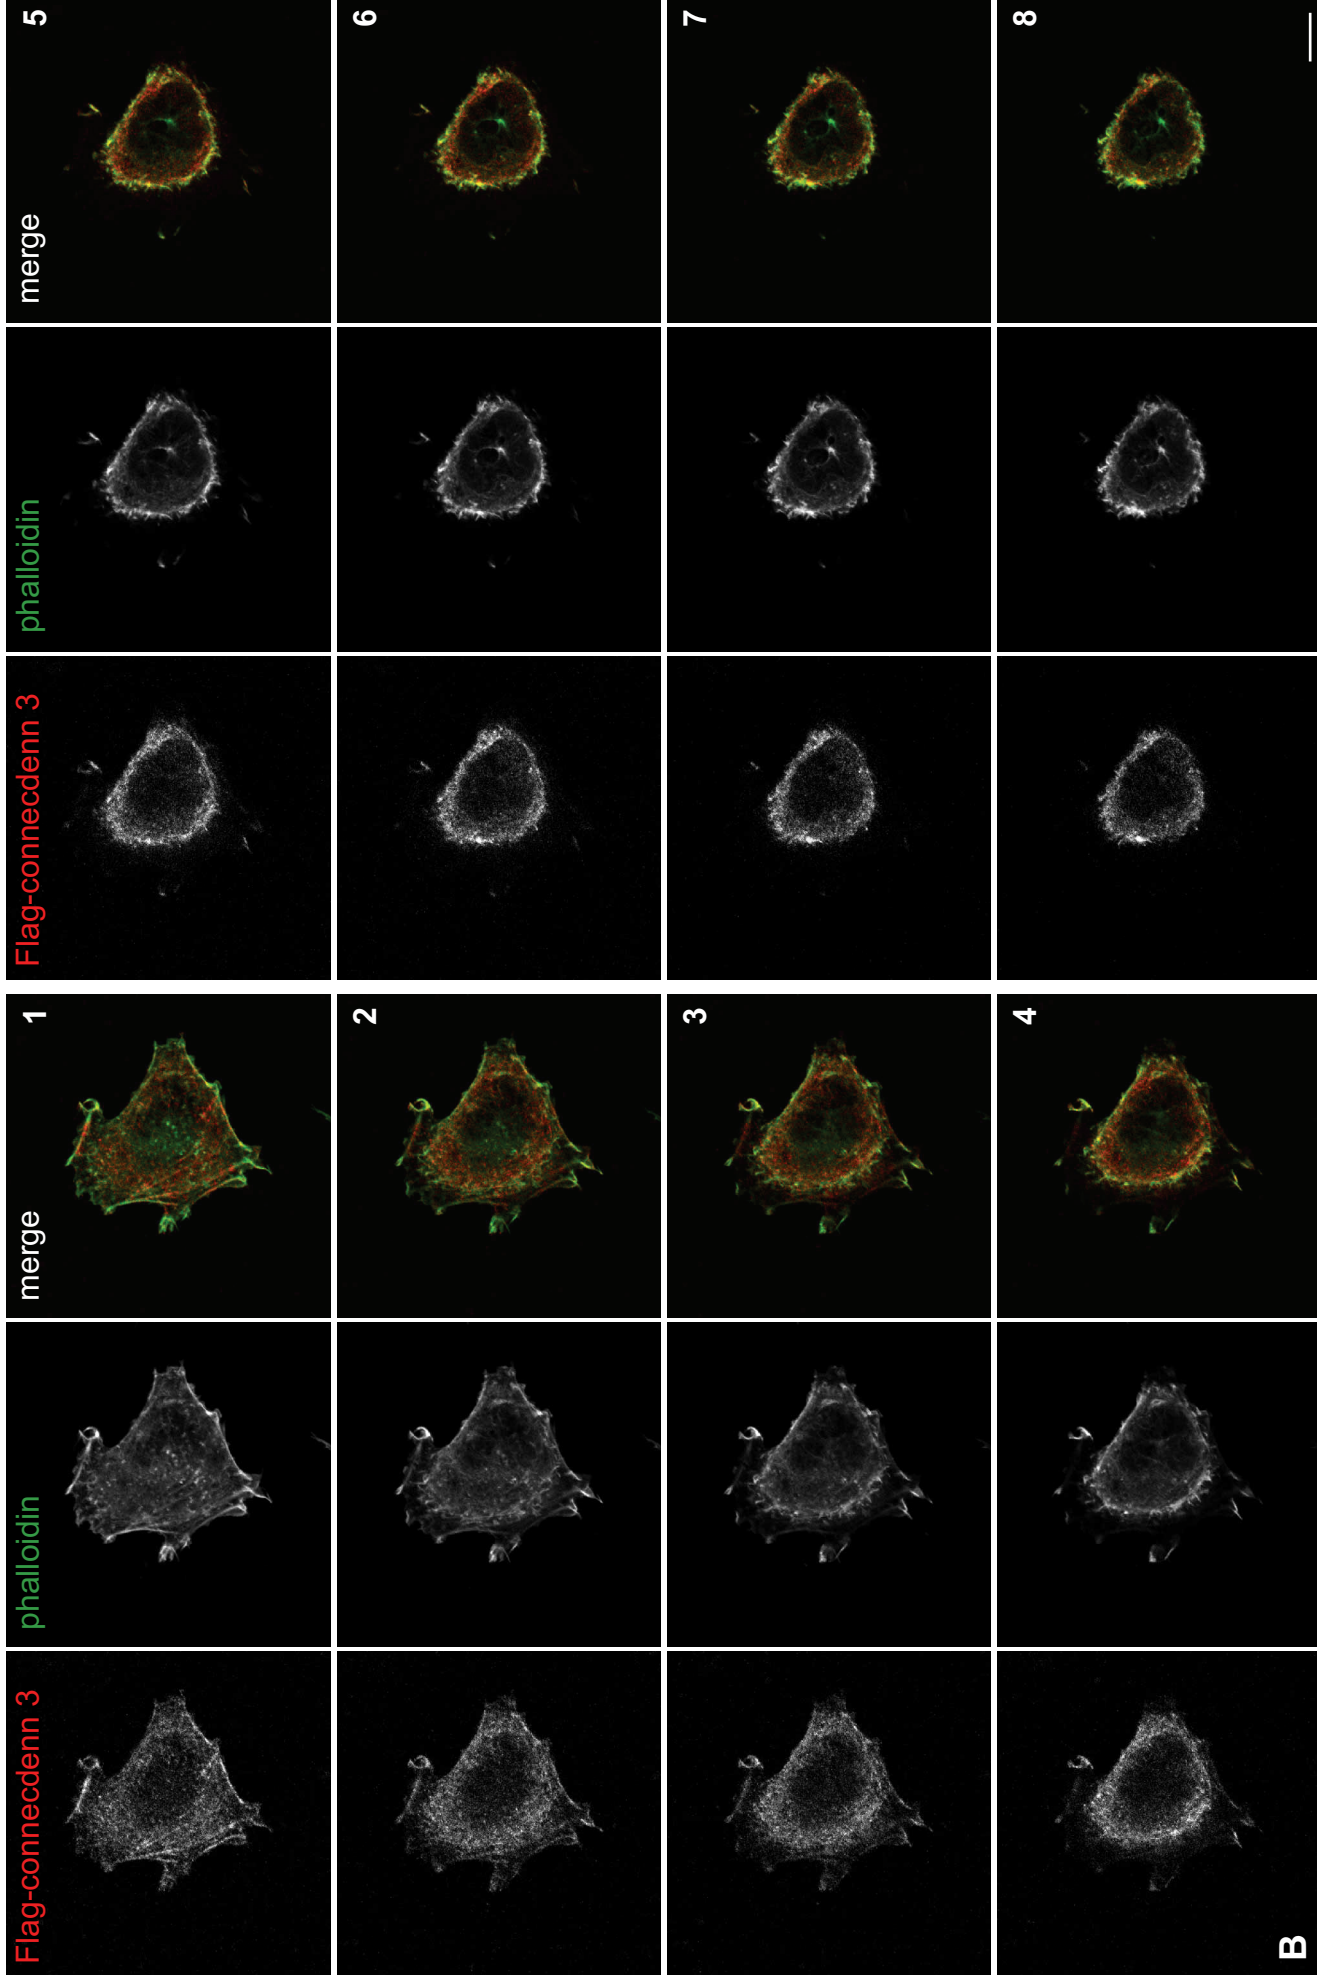

Marat et al., Supplemental Figure 1

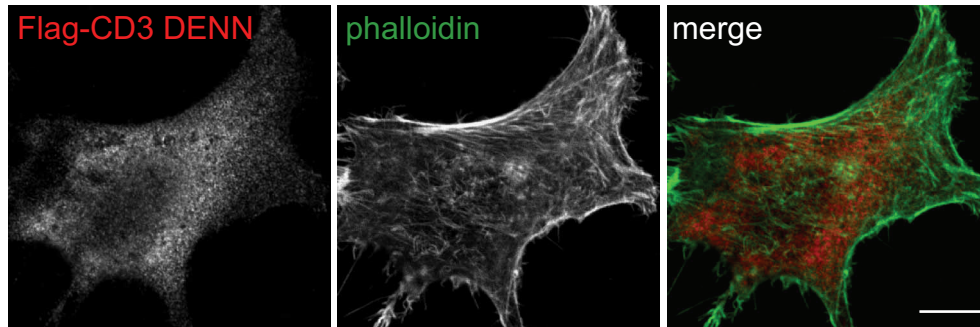

Marat et al., Supplemental Figure 2

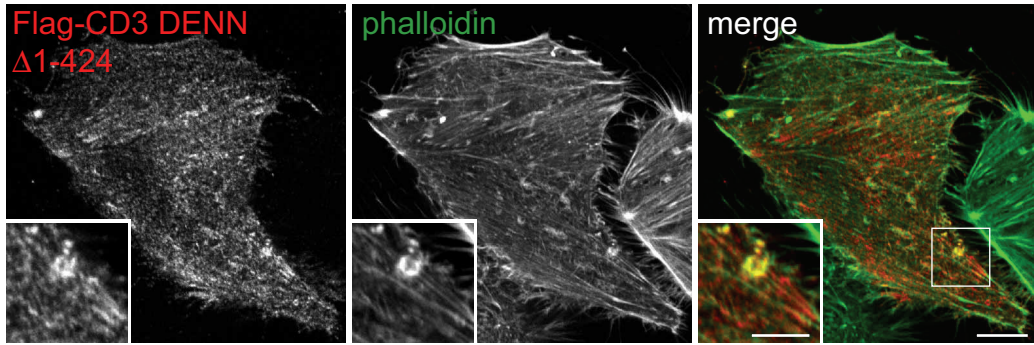

Marat et al., Supplemental Figure 3



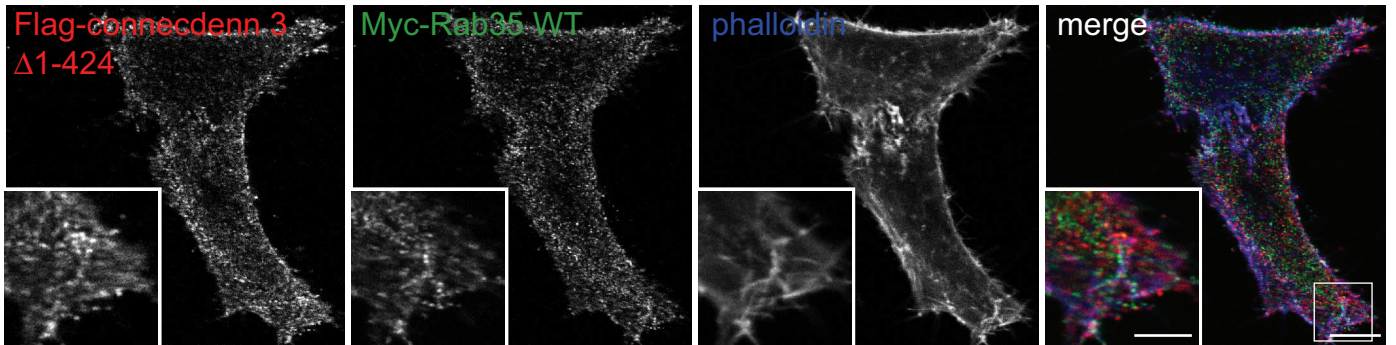

Marat et al., Supplemental Figure 4
